# Supplementary material for: Upcycling of spent functional biocarbon adsorbents to catalysts for the conversion of C5/C6 carbohydrates into platform chemicals
Source: Royal Society of Chemistry journal article supplement (doi:10.1039/d3su00004d), 2023-01-01
Supplement: d3su00004d1.pdf [file d3su00004d1.pdf]

## Supplementary data

### **Upcycling of spent functional biocarbon adsorbents to catalysts for conversion of C5/C6 carbohydrates into platform chemicals**

Haixin Guo<sup>a,b\*</sup>, Yuto Inoue<sup>b</sup>, Yukiya Isoda<sup>b</sup>, Tetsuo Honma<sup>c</sup>, Richard Lee Smith Jr <sup>b\*</sup>

<sup>a</sup>Agro-Environmental Protection Institute, Ministry of Agriculture and Rural Affairs, No. 31 Fukang Road, Nankai District, Tianjin 300191, China

<sup>b</sup>Graduate School of Environmental Studies, Tohoku University, Aramaki Aza Aoba 468-1, Aoba, Sendai 980-8572, Japan.

<sup>c</sup>Material and Biological Engineering Course, Department of Industrial System Engineering, National Institute of Technology (KOSEN), Hachinohe College, 16-1 Uwanotai, Tamonoki-Aza, Hachinohe, 039-1192, Japan

\*Corresponding Authors:

\* [haixin\\_g@126.com](mailto:haixin_g@126.com) (H.G.);

[richard.smith.c6@tohoku.ac.jp](mailto:richard.smith.c6@tohoku.ac.jp) (R.L.S.)

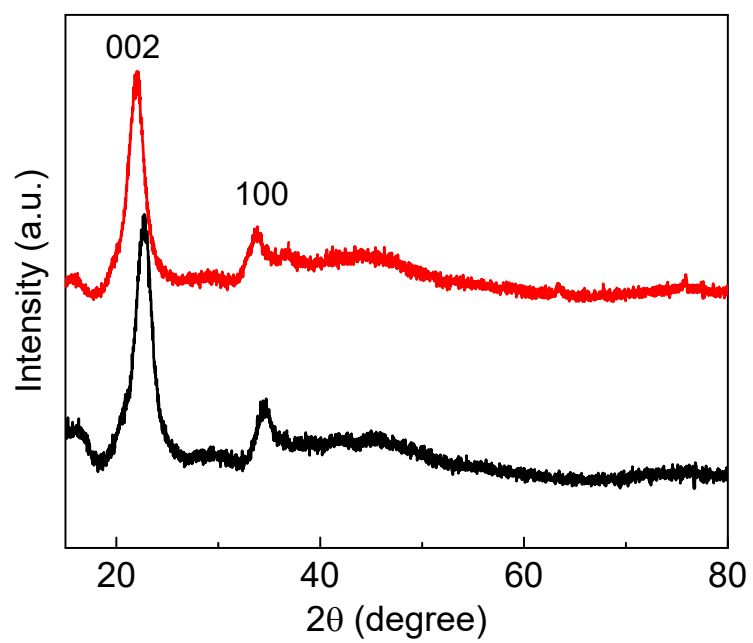

Figure S1. XRD patterns of as-prepared functional biocarbons. Black line: HC; Red line: N-HC.

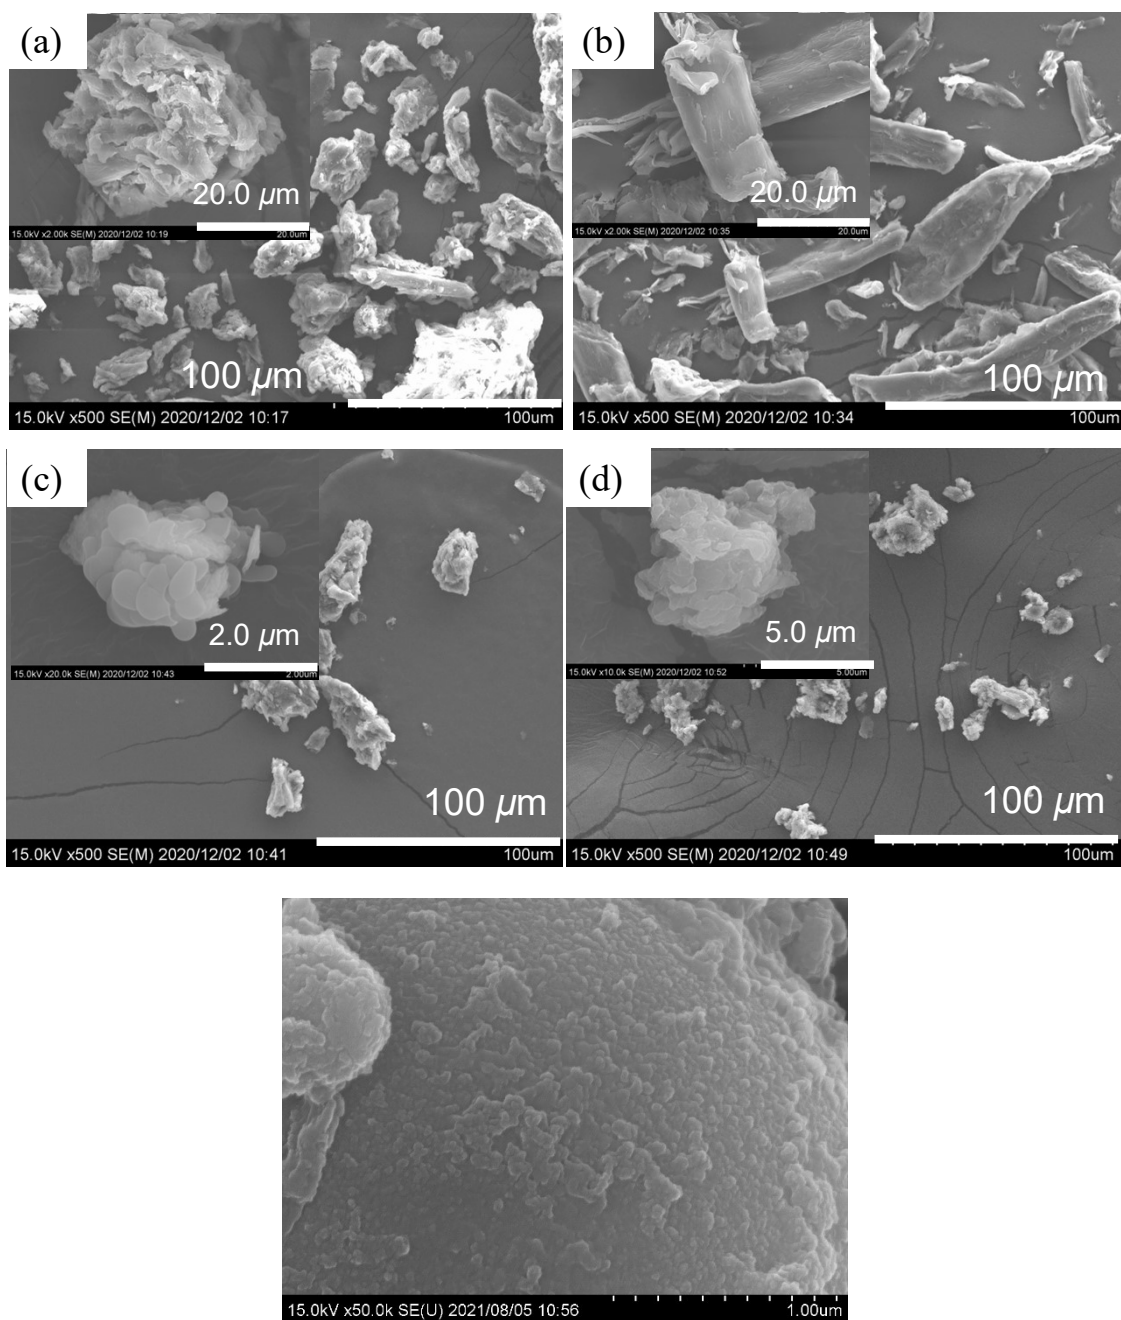

Figure S2. SEM images of as-prepared biocarbon materials (a) HC, (b) N-HC (c) B-HC and (d) BN-HC and (e) Ni-BNS-HC.

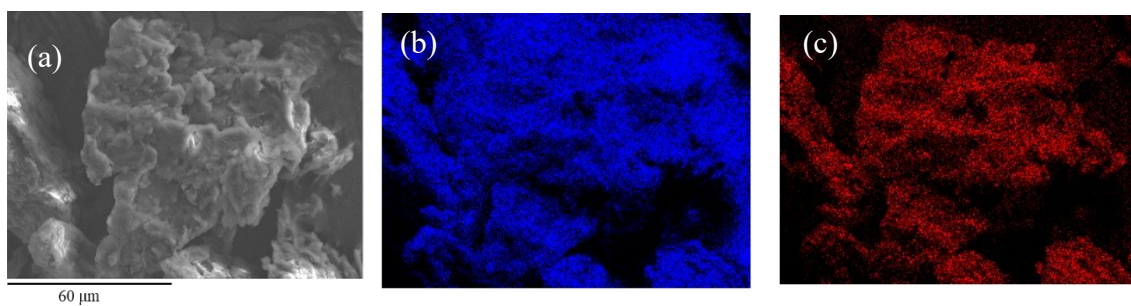

Figure S3. SEM-EDX images of as-prepared HC biocarbon materials: (a) SEM image, and corresponding EDX maps of: (b) carbon, (c) oxygen.

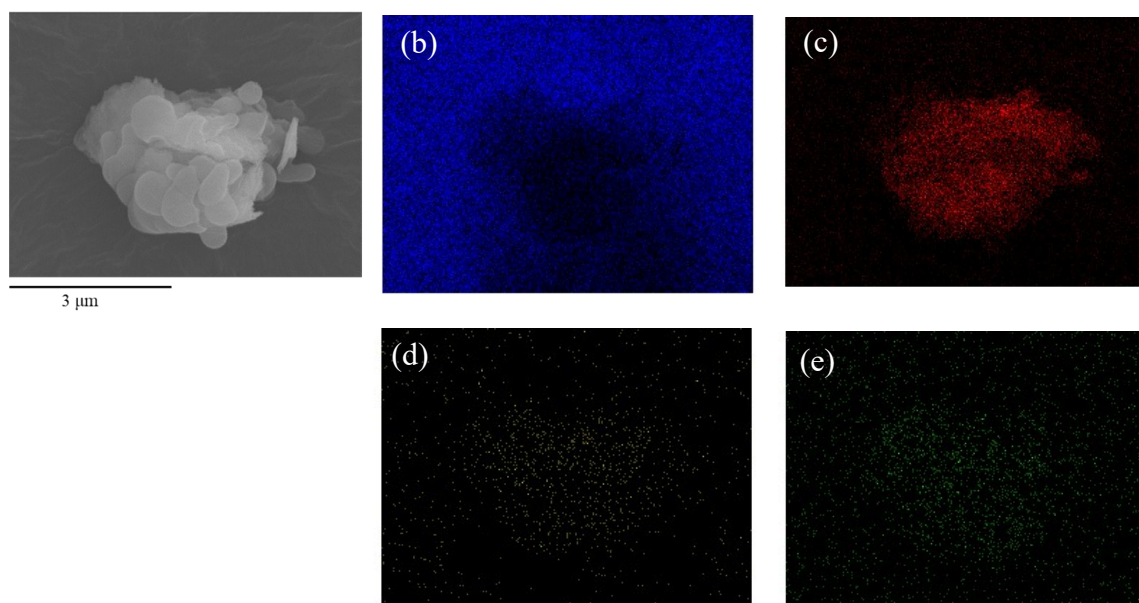

Figure S4. SEM-EDX images of as-prepared B-HC biocarbon materials: (a) SEM image and corresponding EDX maps of (b) carbon, (c) oxygen, (d) nitrogen, (e) sulfur.

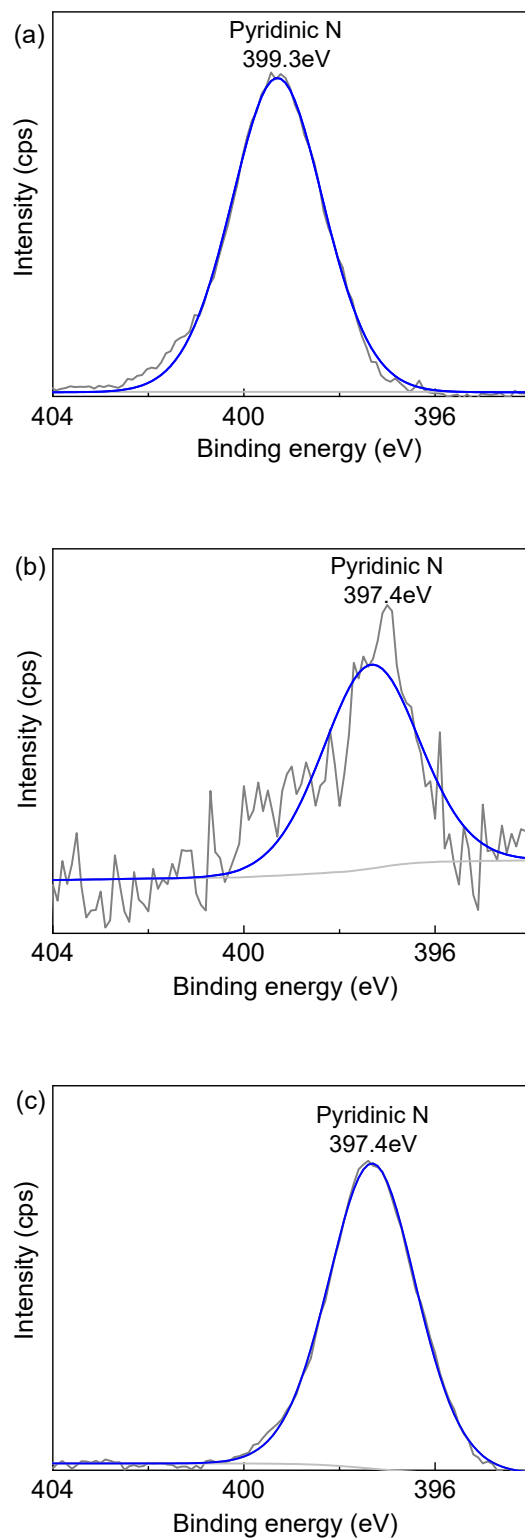

Figure S5. XPS binding energy shifts of N1s for (a) N-HC, (b) B-HC and (c) BN-HC.

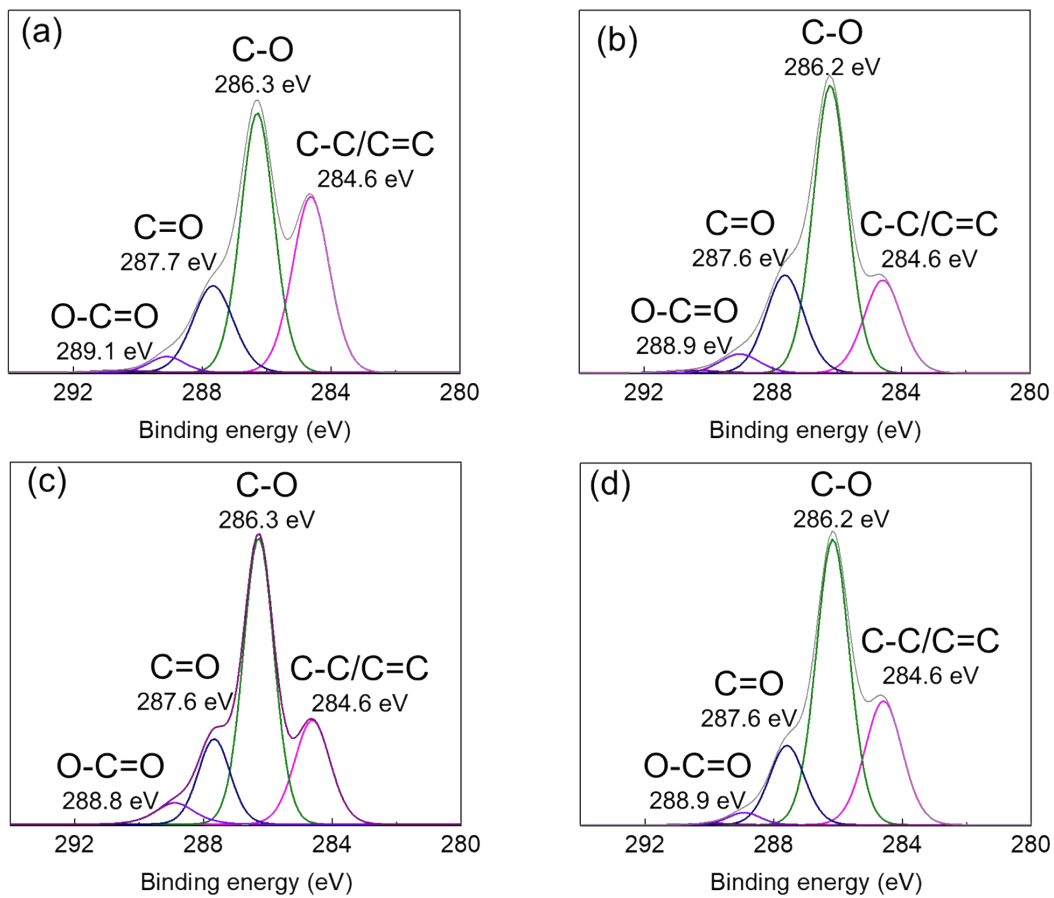

Figure S6. XPS binding energy shifts of C 1s for: (a) HC, (b) N-HTC, (c) B-HC and (d) BN-HC.

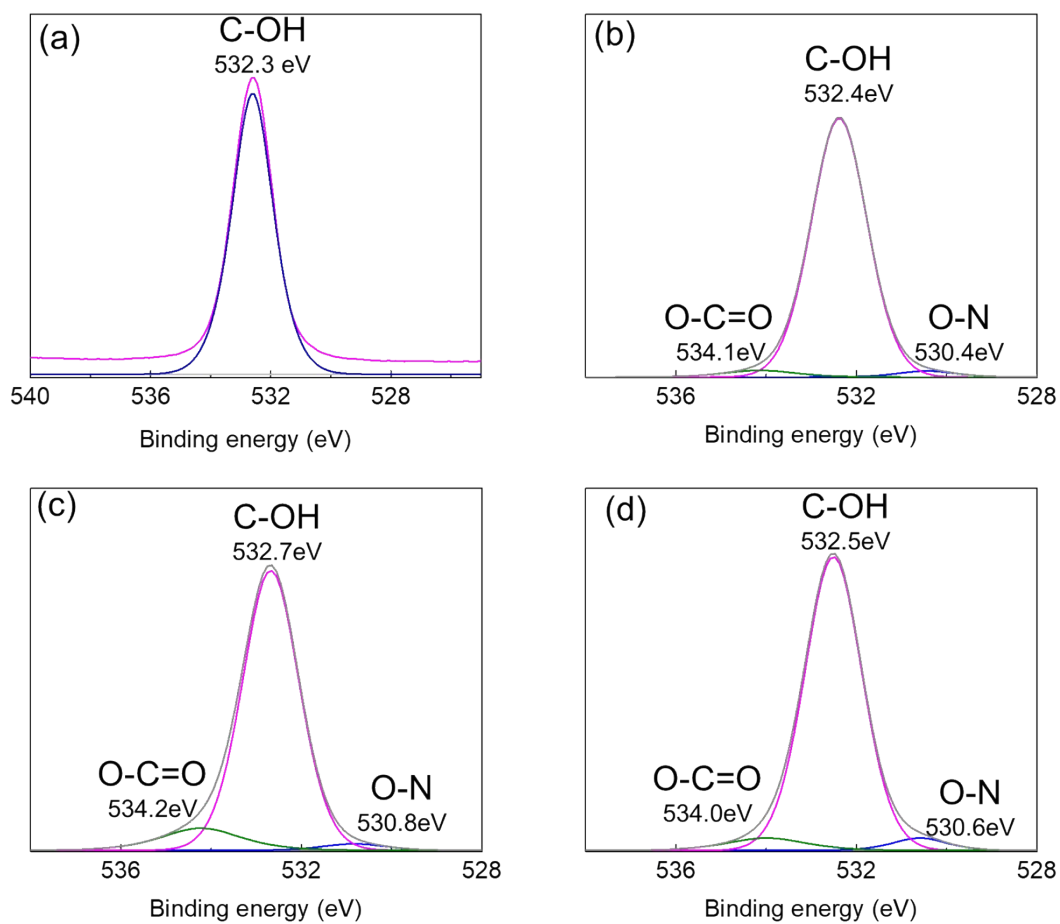

Figure S7. XPS binding energy shifts of O1s for: (a) HC, (b) N-HTC, (c) B-HC and (d) BN-HC.



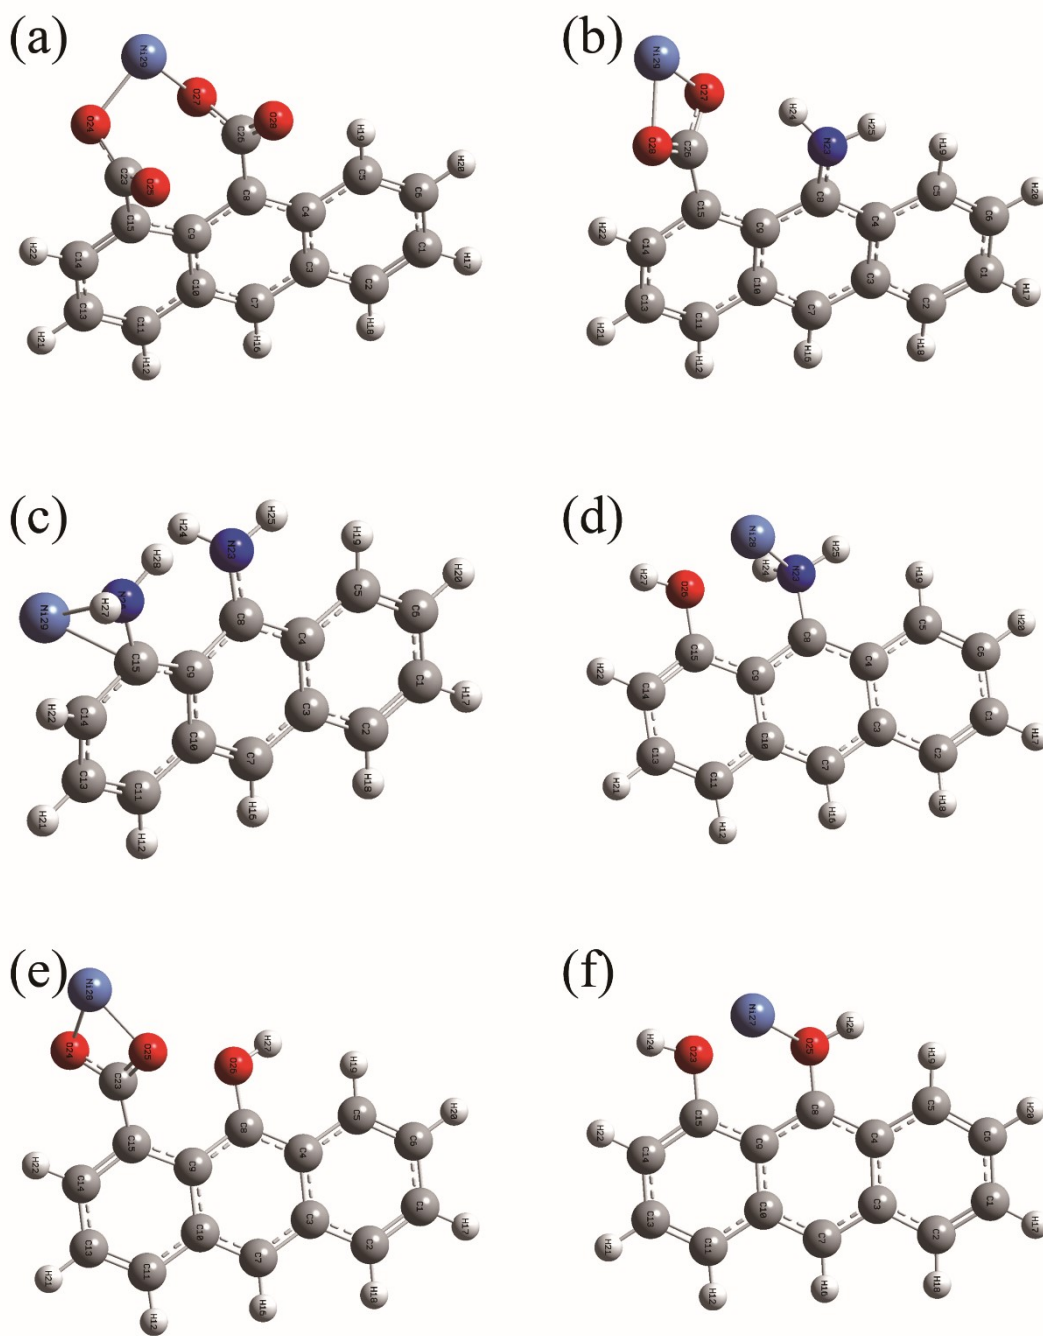

Figure S8. Calculated structures of Ni-carbon complexes by DFT calculations. (a)  $\text{COO}^-$  group. (b)  $\text{NH}_2$ ,  $\text{COO}^-$  group. (c)  $\text{NH}_2$  groups. (d)  $\text{OH}$  and  $\text{NH}_2$  groups. (e)  $\text{COO}^-$  and  $\text{OH}$  groups. (f)  $\text{OH}$  groups. Atom colors are H (white), C (gray), O (red), N (dark blue), and Ni (light blue).

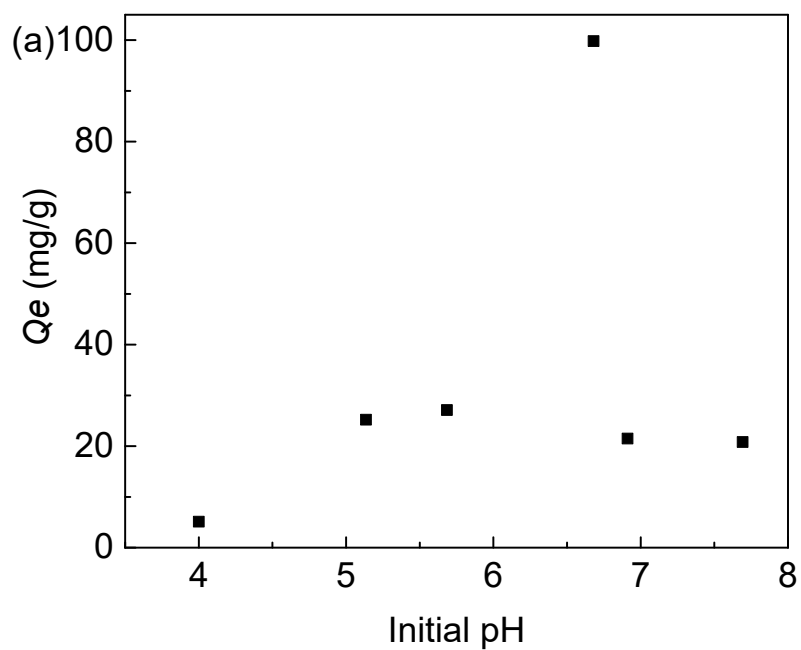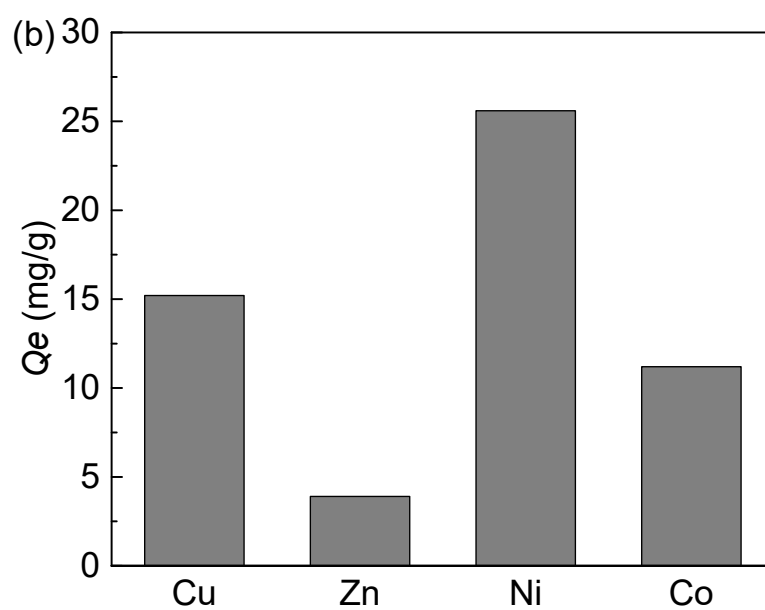

Figure S9. (a) Adsorption of  $\text{Ni}^{2+}$  onto BN-HC biocarbon as a function pH (20 mL of 50 mM of  $\text{Ni}^{2+}$ , 0.05 g of adsorbent, 20 °C, after 30h); (b) Adsorption of  $\text{Cu}^{2+}$ ,  $\text{Zn}^{2+}$ ,  $\text{Ni}^{2+}$  and  $\text{Co}^{2+}$  onto HC biocarbon (Conditions: 20 mL of 10 mM of metal solution, 0.02 g of adsorbent, after 1 h, 20 °C).

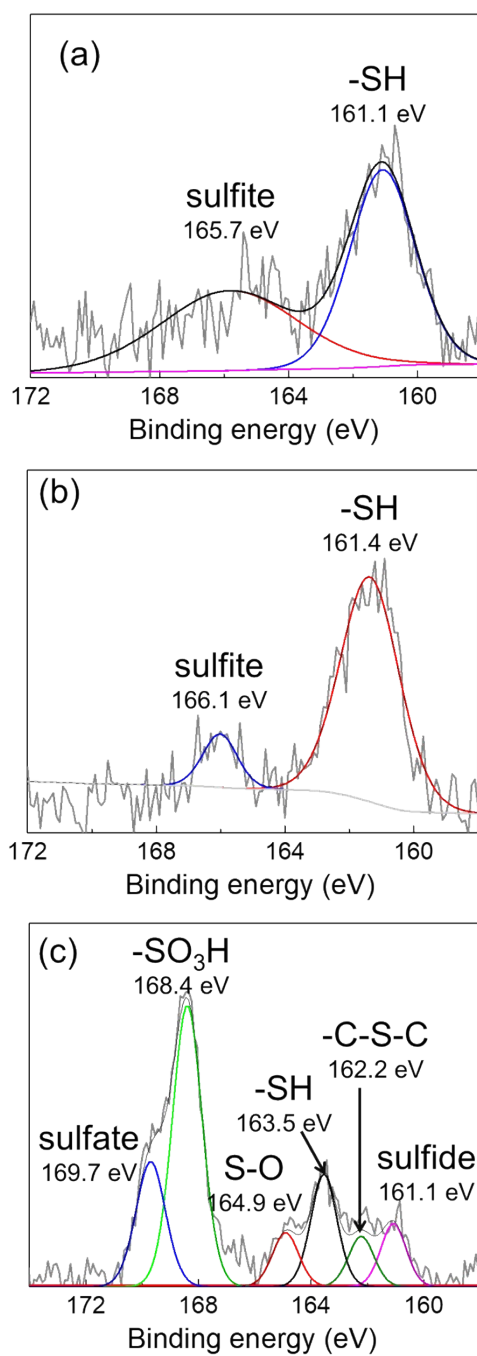

Figure S10. XPS binding energy shifts of S 2p for (a) B-HC and (b) BN-HC and (c) Ni-BNS-HC.

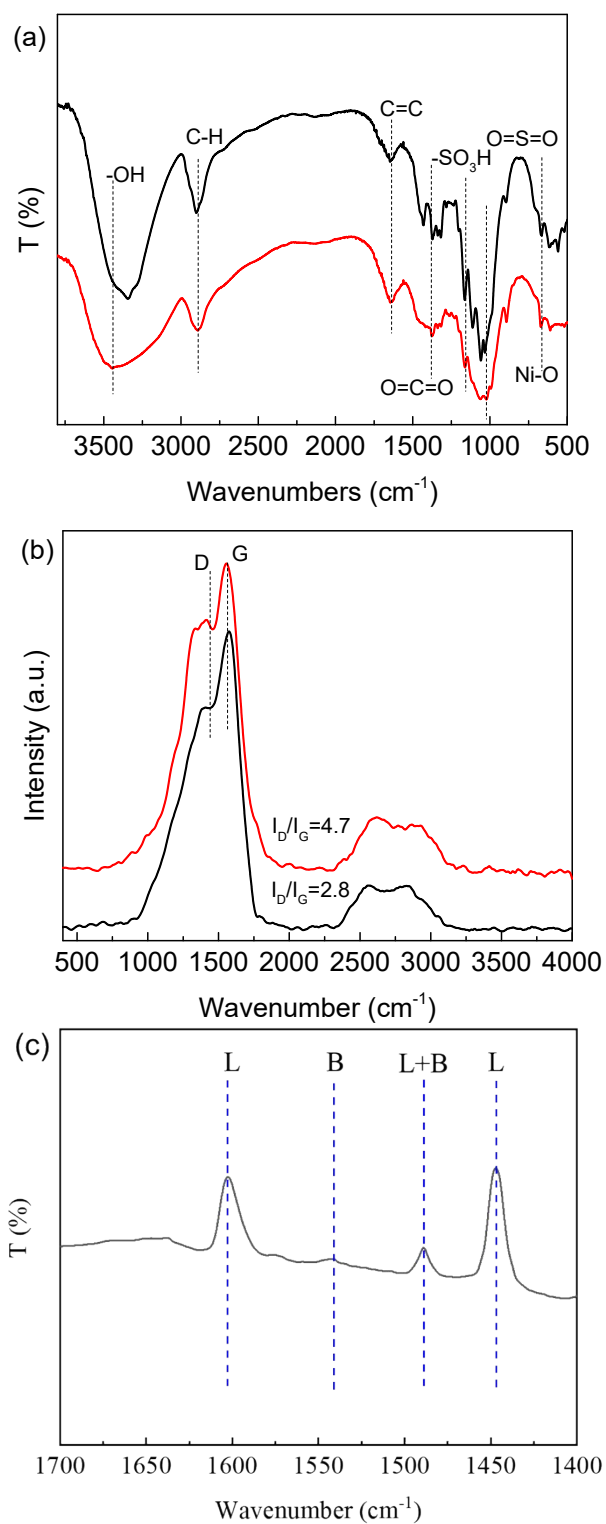

Figure S11. (a) FT-IR spectra of Ni-BN-HC (red line) and Ni-BNS-HC (black line); (b) Raman spectra of BNS-HC (black line) and Ni-BNS-HC (red line) and (c) Py-FTIR spectra (150 °C) of Ni-BNS-HC (Lewis acidity (L), Brønsted acidity (B)).

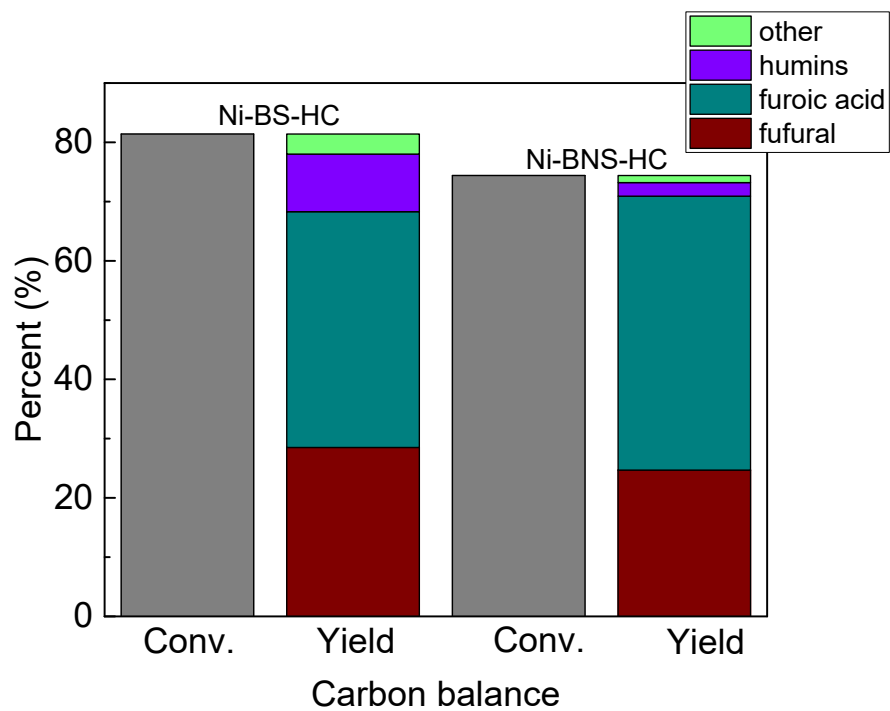

Figure S12. Carbon balance calculation for the conversion of xylose with Ni-BS-HC or Ni-BNS-HC at 150 °C after 4 h reaction time.

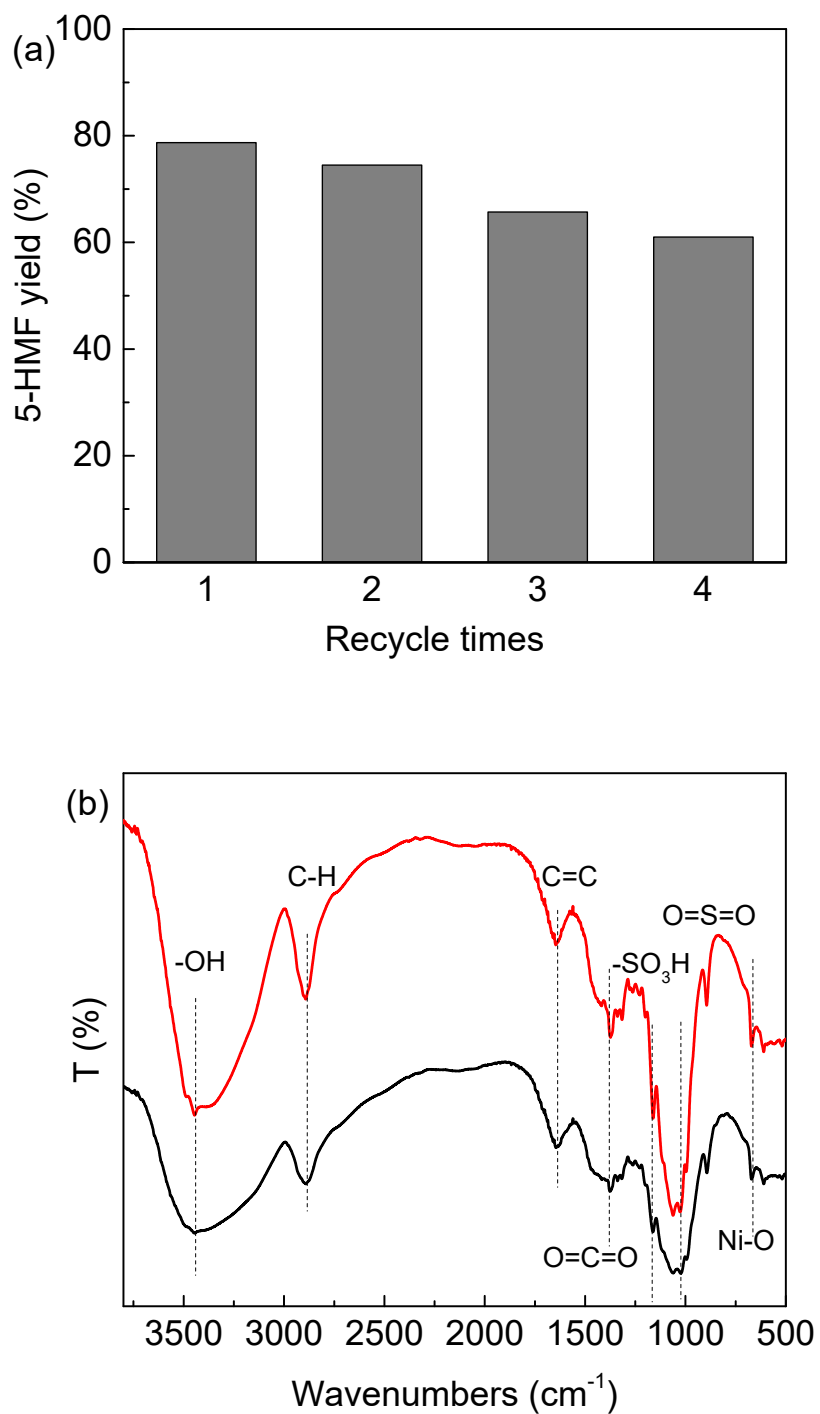

Figure S13. Recycle of Ni-BNS-HC as catalyst for conversion of fructose to 5-HMF: (a) Change in 5-HMF yield with recycle times, (b) FT-IR spectra of fresh Ni-BNS-HC (black line) and Ni-BNS-HC after four cycles (red line). Reaction conditions: 0.1 g of fructose, 2 g of [BMIM]Cl ionic liquid, 0.05 g of catalyst at 120 °C and 1.5 h reaction time.

**Table S1.** Properties of hydrothermal biocarbons (HC) according to ball-milling with L-cysteine (B-HC), synthesis with ammonia solution (N-HC) and combination (BN-HC) treatment.

| Catalyst  | S <sub>BET</sub><br>(m <sup>2</sup> /g) | Dp<br>(nm) | Functional groups (mmol/g) |                    |                    | Elemental content<br>XPS (%) |      |     |     |
|-----------|-----------------------------------------|------------|----------------------------|--------------------|--------------------|------------------------------|------|-----|-----|
|           |                                         |            | -OH <sup>a</sup>           | -COOH <sup>b</sup> | Amino <sup>c</sup> | C                            | O    | N   | S   |
| HC        | 1.1                                     | 25.0       | 1.03                       | 1.39               | -                  | 63.4                         | 36.6 | -   | -   |
| B-HC      | 1.4                                     | 18.6       | 1.81                       | 1.11               | -                  | 57.8                         | 41.7 | 0.3 | 0.2 |
| N-HC      | 1.8                                     | 17.8       | 1.49                       | 2.37               | 2.37               | 59.3                         | 38.8 | 1.9 | -   |
| BN-HC     | 2.2                                     | 18.4       | 0.53                       | 1.59               | 5.4                | 60.1                         | 36.5 | 3.2 | 0.2 |
| Ni-BNS-HC | <5                                      | -          | -                          | -                  | -                  | 30.7                         | 59.7 | 2.4 | 1.8 |

<sup>a</sup>Obtained by subtracting titration results using Na<sub>2</sub>CO<sub>3</sub> from calculated values of NaOH

<sup>b</sup>Obtained by subtracting concentration of sulfonic groups from titration results with NaHCO<sub>3</sub>

<sup>c</sup>Obtained by XPS analysis.

Table S2. Langmuir and Freundlich parameters for isothermal adsorption of Ni<sup>2+</sup> onto functional hydrothermal biocarbon (HC) and amino-functional hydrothermal biocarbon (N-HC).

| Entry | Adsorbent | Langmuir               |                       |                | Freundlich     |      |                | F-test (Langmuir/Freundlich) |
|-------|-----------|------------------------|-----------------------|----------------|----------------|------|----------------|------------------------------|
|       |           | K <sub>L</sub> (L/mg)  | Q <sub>m</sub> (mg/g) | R <sup>2</sup> | K <sub>F</sub> | n    | R <sup>2</sup> | F                            |
| 1     | HC        | 9.6 x 10 <sup>-5</sup> | 285.7                 | 0.96           | 0.07           | 1.17 | 0.99           | 0.47                         |
| 2     | N-HC      | 1.0 x 10 <sup>-4</sup> | 312.5                 | 0.87           | 0.04           | 1.07 | 0.98           | 0.96                         |
| 3     | B-HC      | 1.0 x 10 <sup>-4</sup> | 130.0                 | 0.93           | 0.02           | 1.09 | 0.99           | 0.004                        |
| 4     | BN-HC     | 1.2 x 10 <sup>-4</sup> | 313.5                 | 0.93           | 0.05           | 1.07 | 0.99           | 0.005                        |



Table S3. Analysis of the residuals from Langmuir and Freundlich models with F-test.

| Cs(mM) | Q <sub>date</sub> (mg/g) | Q <sub>model</sub> (mg/g) |            | Residual |            | F-test <sup>a</sup> |
|--------|--------------------------|---------------------------|------------|----------|------------|---------------------|
|        |                          | Langmuir                  | Freundlich | Langmuir | Freundlich |                     |
| HC     |                          |                           |            |          |            | 0.47                |
| 0      | 0                        | 0                         | 0          | 0        | 0          |                     |
| 19.5   | 28.6                     | 28.3354                   | 28.4862    | 0.0700   | 0.0130     |                     |
| 29     | 39.7                     | 40.1977                   | 39.9663    | 0.2477   | 0.0709     |                     |
| 38.7   | 51.2                     | 51.2321                   | 51.1224    | 0.0010   | 0.0060     |                     |
| 44.1   | 58                       | 56.9558                   | 57.1493    | 1.0905   | 0.7236     |                     |
| N-HC   |                          |                           |            |          |            | 0.96                |
| 0      | 0                        | 0                         | 0          | 0        | 0          |                     |
| 19.5   | 29.8                     | 32.6509                   | 30.8054    | 8.1276   | 1.0108     |                     |
| 28.7   | 46.4                     | 45.7978                   | 44.2469    | 0.3626   | 4.6357     |                     |
| 38.4   | 59.8                     | 58.3847                   | 58.1237    | 2.0032   | 2.8098     |                     |
| 46     | 66                       | 67.4460                   | 68.8385    | 2.0909   | 8.0571     |                     |
| B-HC   |                          |                           |            |          |            | 0.004               |
| 0      | 0                        | 0                         | 0          | 0        | 0          |                     |
| 18.6   | 33.7                     | 37.5932                   | 34.7832    | 15.1570  | 1.1732     |                     |
| 28.7   | 53.4                     | 54.4603                   | 52.1539    | 1.1242   | 1.5528     |                     |
| 37.2   | 66                       | 67.1354                   | 66.4509    | 1.2891   | 0.2033     |                     |
| 46.6   | 80.4                     | 79.7822                   | 82.0118    | 0.3817   | 2.5979     |                     |
| BN-HC  |                          |                           |            |          |            | 0.005               |
| 0      | 0                        | 0                         | 0          | 0        | 0          |                     |
| 19.7   | 12.8                     | 12.7295                   | 12.6148    | 0.0050   | 0.0343     |                     |
| 29.7   | 18                       | 18.2816                   | 18.3631    | 0.0793   | 0.1318     |                     |
| 39.8   | 23.5                     | 23.3794                   | 24.0002    | 0.0145   | 0.2502     |                     |
| 50     | 30.7                     | 28.0758                   | 29.5692    | 6.8865   | 1.2787     |                     |

<sup>a</sup>F-test on data fits comparing Langmuir and Freundlich models.
